# Supplementary material
Source: Frontiers journal article supplement (https://www.frontiersin.org/articles/166522)
Supplement: downloadfile [file 166522]

## *Supplementary Material*

# **Implementation of genomic prediction in *Lolium perenne* (L.) breeding populations**

**Nastasiya F. Grinberg<sup>1</sup>, Alan Lovatt<sup>2</sup>, Matt Hegarty<sup>2</sup>, Andi Lovatt<sup>2</sup>, Kirsten P. Skøt<sup>2</sup>, Rhys Kelly<sup>2</sup>, Tina Blackmore<sup>2</sup>, Danny Thorogood<sup>2</sup>, Ross King<sup>1</sup>, Ian Armstead<sup>2</sup>, Wayne Powell<sup>2,3</sup>, Leif Skøt<sup>2\*</sup>**

<sup>1</sup>Manchester Institute of Biotechnology, University of Manchester, Manchester, UK

<sup>2</sup>Institute of Biological, Environmental and Rural Sciences, Aberystwyth University, Aberystwyth, UK

<sup>3</sup>CGIAR Consortium, CGIAR Consortium Office, 1000 Avenue Agropolis 34394, Montpellier, France

\* **Correspondence:** Leif Skøt, E-mail: lfs@aber.ac.uk

### 1.1 Supplementary Figures

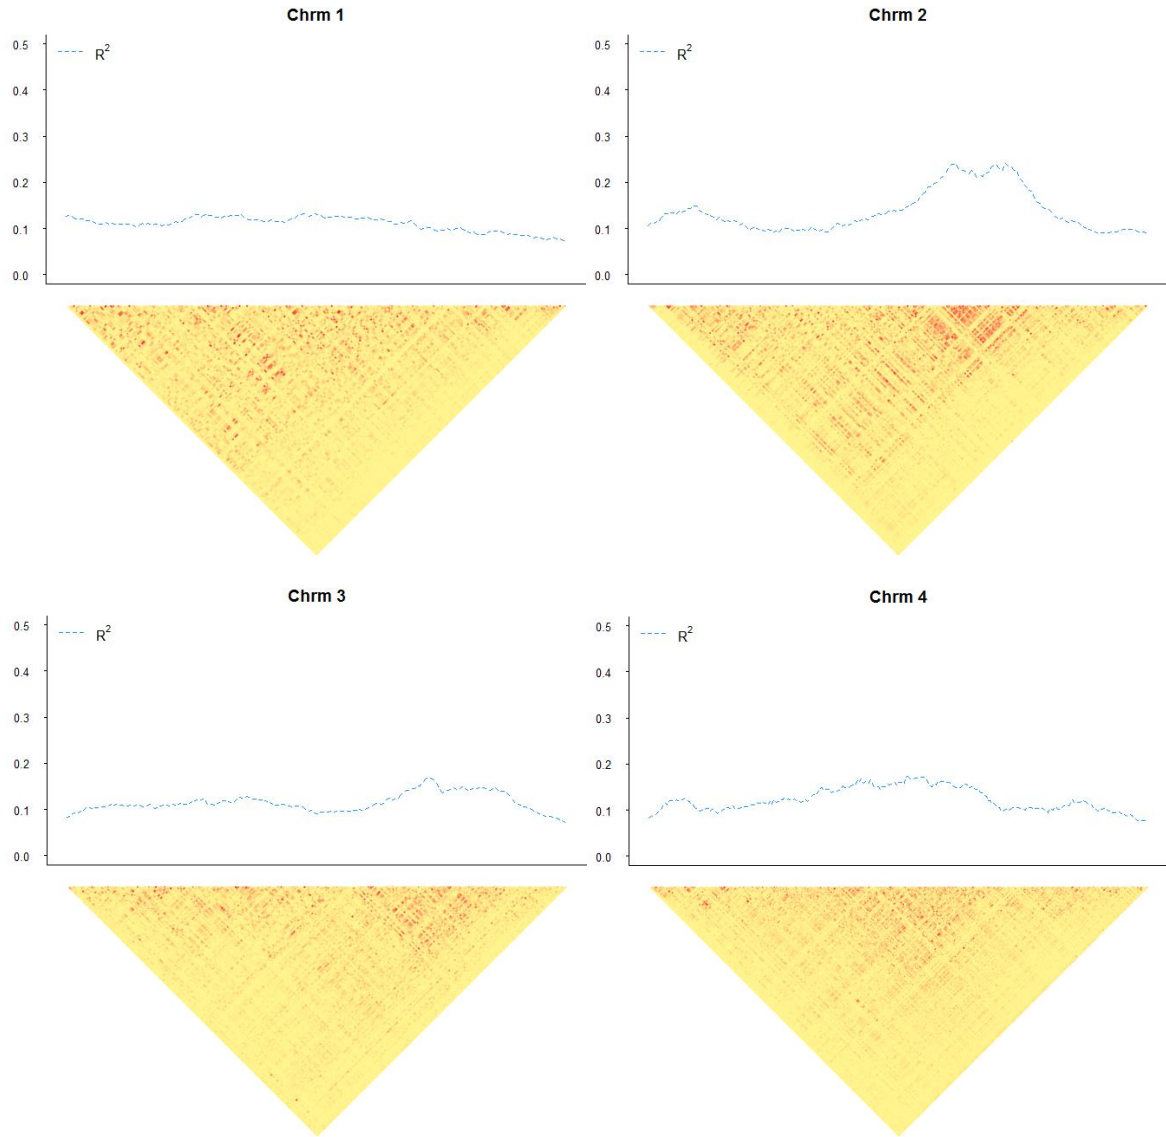

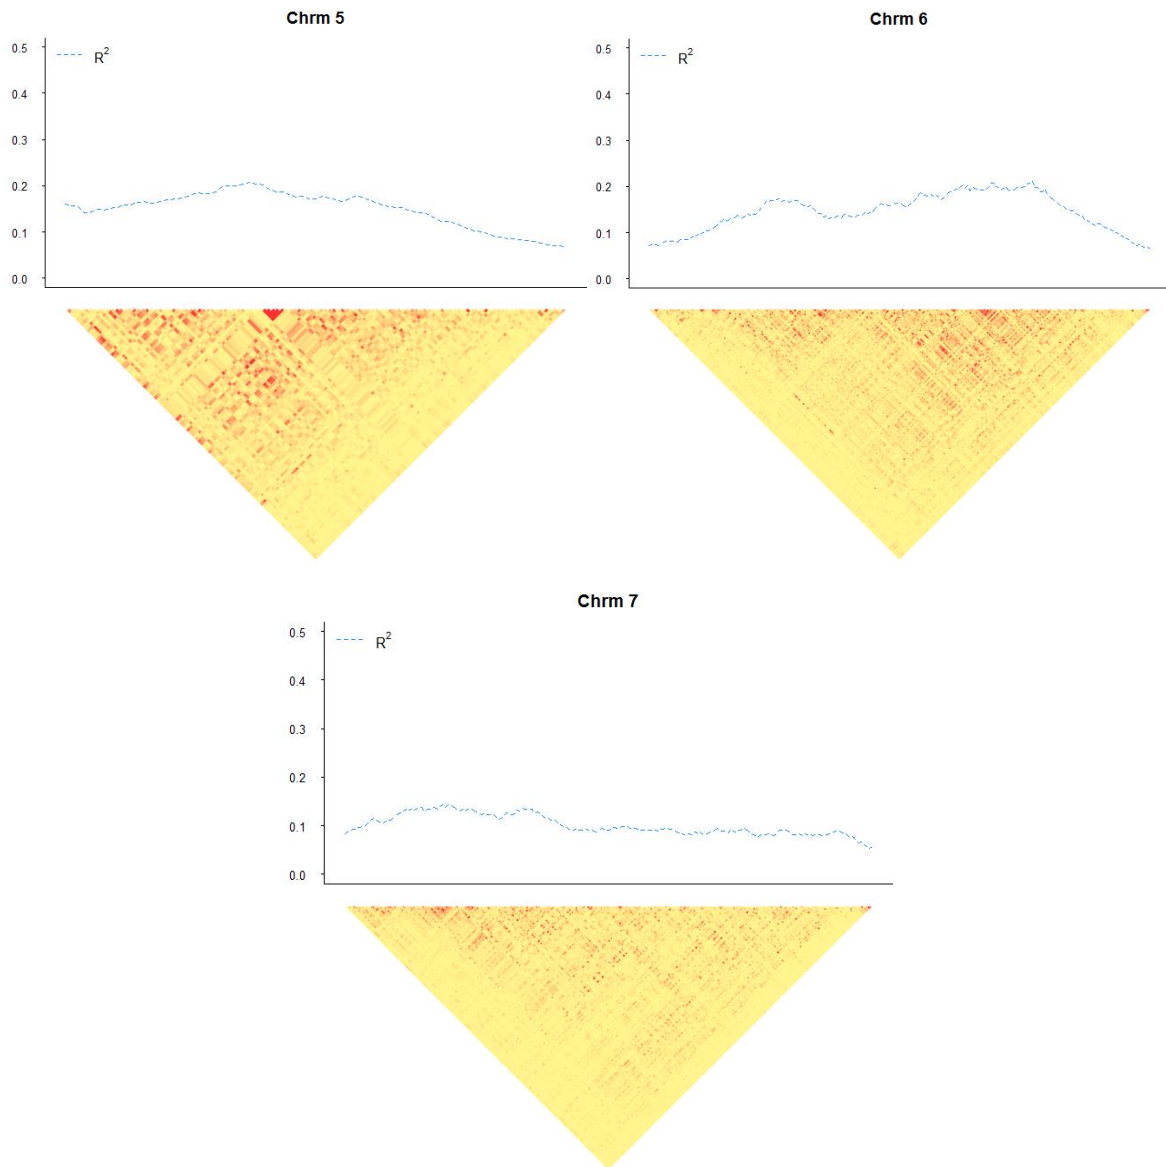

**Supplementary Figure 1.** Landscape plot and heatmaps of linkage disequilibrium in the *L. perenne* breeding populations. The landscape plots were based on a windows size of  $n=40$ , as described in Materials and Methods.
